1           **The *Escherichia coli serS* gene promoter**  
2           **region overlaps with the *rarA* gene**  
3  
4

5           **Kanika Jain\***, Tyler H. Stanage, Elizabeth A. Wood, and Michael M. Cox

6           Department of Biochemistry, University of Wisconsin-Madison, Madison, Wisconsin 53706  
7  
8  
9  
10

11           **\*Corresponding author**

12           **Email:** [kjain5@wisc.edu](mailto:kjain5@wisc.edu)  
13  
14  
15  
16  
17  
18  
19  
20

## 21 **Abstract**

22 Deletion of the entire gene encoding the RarA protein of *Escherichia coli* results in a  
23 growth defect and additional deficiencies that were initially ascribed to a lack of RarA function.  
24 Further work revealed that most of the effects reflected the presence of sequences in the *raraA* gene  
25 that affect expression of the downstream gene, *serS*. The *serS* gene encodes the seryl aminoacyl-  
26 tRNA synthetase. Decreases in the expression of *serS* can trigger the stringent response. The  
27 sequences that affect *serS* expression are located in the last 15 nucleotides of the *raraA* gene.

28

## 29 **Introduction**

30

31 When a replication fork encounters roadblocks, such as DNA lesions, template strand breaks, or  
32 DNA-bound proteins, it can stall. Outcomes may include fork collapse and replisome dissociation  
33 (1-11). These events can have catastrophic consequences for genomic integrity and cell viability,  
34 if left unrepaired. In bacteria, estimates vary, but replication forks may stall as often as once per  
35 cell generation during normal growth conditions (2, 12-20). Most of the adverse replication fork  
36 encounters are resolved using a variety of pathways that do not introduce mutations (2, 3, 7, 9-13,  
37 21-26). Sometimes, a fork skips over the lesion and re-initiates downstream, leaving the lesion  
38 behind in what is called as a post-replication gap (4, 8, 13, 27-31). There appear to be three major  
39 paths for filling post-replication gaps in bacteria: (a) RecA-mediated homologous recombination  
40 (32-35), (b) translesion DNA synthesis (1, 36, 37), and (c) a RecA-independent template switching  
41 process (38-41). The *Escherichia coli* RarA protein is required for most of this RecA-independent  
42 recombination (41). More prominently, the RarA protein is involved in the resolution of

43 recombination intermediates as part of an expanded RecFOR pathway for the amelioration of post-  
44 replication gaps (*manuscript under review*).

45         The *Escherichia coli* RarA protein is an ATPase in the AAA+ superfamily (42, 43). The  
46 *rarA* gene encodes a 447-amino-acid polypeptide with a predicted monomeric mass of 49594 kDa.  
47 The protein is part of a highly conserved family. It is absent in archaea but highly conserved from  
48 bacteria through eukaryotes, sharing about 40% identity and 56-58% similarity with its  
49 *Saccharomyces cerevisiae* (Mgs1) and Homo sapiens (WRNIP1) homologs (42, 43). In *E. coli*,  
50 RarA shares 25% amino acid identity with two other proteins: RuvB, a Holliday Junction helicase,  
51 and DnaX, a subunit of DNA polymerase III replisome. DnaX encodes for Tau ( $\tau$ ) and Gamma ( $\gamma$ )  
52 components of DNA polymerase III clamp loader complex, placing RarA in the clamp loader  
53 AAA+ clade (42, 43).

54         In *E. coli* chromosome, the *rarA* gene is located at 20.21 centisomes (location  
55 937,994>939,337). The *rarA* gene is immediately upstream of an essential gene, *serS*, a serine-  
56 tRNA ligase, located at 20.24 centisomes. SerS is among the 20 aminoacyl-tRNA synthetases  
57 (aaRSs) or tRNA-ligases present in the cell. aaRSs are the charging portals of tRNAs. They  
58 generate a covalent linkage between an amino acid and its cognate tRNA to form an aminoacyl-  
59 tRNA complex. The ribosome acts on this charged tRNA complex and transfers its attached amino  
60 acid onto the growing peptide chain - thereby fostering the translation process in the cell. SerS  
61 aminoacylates tRNA<sup>Ser</sup> and tRNA<sup>Sec</sup> with serine (44, 45). *serS* is mainly regulated by its promoter  
62 (*serSp1*) with a transcription start located at 939,365<sup>th</sup> position after the end of *rarA* gene (46)  
63 (**Figure 1**).

64 **Figure 1: Identification of possible promoter/regulatory sequence of *serS* within the *rarA***  
65 **sequence.** Representation of predicted promoter sequences and their location in the last 40 amino  
66 acids region of *rarA*.

67

68 aaRSs manage the growth and the stringent response in the cell by directly controlling the  
69 two interdependent cellular processes: (1) the flux of protein synthesis, and (2) the levels of  
70 uncharged tRNAs. The first process - the flux of protein synthesis - is directly dependent on the  
71 amount of tRNA aminoacylated by aaRSs. Modifications in aaRSs production impedes cell growth  
72 (47, 48). Globally, high levels of uncharged tRNA slow translation kinetics and thereby slow cell  
73 growth - both in bacteria and eukaryotes (49-51). In bacteria, these high levels of uncharged tRNA  
74 are detected by the (p)ppGpp synthetase -RelA- which in response induces a stringent response  
75 and affects the cell growth (52-54).

76 SerS is notable as it is inhibited by serine hydroxamate, a small molecule often used by  
77 investigators to induce the stringent response (55). We have found that the complete deletion of  
78 the *rarA* gene slows cell growth, impedes SOS induction, and rescues DNA damage sensitivity of  
79 several repair-deficient cells, effects we initially attributed to a lack of RarA function. This initial  
80 conclusion was in error. All of these phenotypes disappear when a slightly more modest *rarA*  
81 deletion is used that deletes more than 90% of the coding sequence, all but the last 41 codons. This  
82 suggests that regulatory sequences that affect *serS* expression may be embedded in the *rarA* coding  
83 sequence. Keeping a small portion of the *rarA* gene, that which encodes C-terminal of RarA, is  
84 vital for optimal growth of the *E. coli* cell. A -35 segment of the *serS* promoter or some equivalent  
85 regulatory sequence appears to be located in the last 15 nucleotides of the *rarA* gene.

86

## 87 **Materials and Methods:**

### 88 **Strain construction**

89

90 All strains are *E. coli* MG1655 derivatives and are listed in **Table 1**. Some of the *rara* strains  
91 (*raraAN406*, *raraAN430*, *raraAN437* and *raraAN442*) were made using *galK*<sup>+</sup> recombineering  
92 method. *raraAN447* (EAW98) and all other strains were constructed using Lambda red  
93 recombination as described by Datsenko and Wanner (59). Kanamycin resistance of these strains  
94 was removed using FLP recombinase when required (62). All chromosomal mutations were  
95 confirmed using Sanger sequencing. Standard transformation protocols were used to generate  
96 strains harboring the indicated plasmids as listed in **Table 1**.

| Strain         | Genotype                                                                                                                                                                                                                                                       | Parent strain | Source/Technique                                             |
|----------------|----------------------------------------------------------------------------------------------------------------------------------------------------------------------------------------------------------------------------------------------------------------|---------------|--------------------------------------------------------------|
| <b>MG1655</b>  | <i>raraA</i> <sup>+</sup> <i>recA</i> <sup>+</sup> <i>exoI</i> <sup>+</sup> <i>recJ</i> <sup>+</sup> <i>recF</i> <sup>+</sup> <i>recO</i> <sup>+</sup> <i>recR</i> <sup>+</sup> <i>polB</i> <sup>+</sup><br><i>dinB</i> <sup>+</sup> <i>umuDC</i> <sup>+</sup> |               | George Weinstock                                             |
| <b>EAW98</b>   | <i>raraAN447</i> Kan <sup>+</sup>                                                                                                                                                                                                                              | MG1655        | Lambda RED recombination                                     |
| <b>EAW974</b>  | <i>raraAN406</i>                                                                                                                                                                                                                                               | MG1655        | Gal K <sup>+</sup> recombineering with no antibiotic markers |
| <b>EAW968</b>  | <i>raraAN430</i>                                                                                                                                                                                                                                               | MG1655        | Gal K <sup>+</sup> recombineering with no antibiotic markers |
| <b>EAW1449</b> | <i>raraAN437</i>                                                                                                                                                                                                                                               | MG1655        | Gal K <sup>+</sup> recombineering with no antibiotic markers |
| <b>EAW1450</b> | <i>raraAN442</i>                                                                                                                                                                                                                                               | MG1655        | Gal K <sup>+</sup> recombineering with no antibiotic markers |
| <b>EAW629</b>  | $\Delta recF$                                                                                                                                                                                                                                                  | MG1655        | Transduction of MG1655 with P1 grown on $\Delta recF$        |
| <b>EAW114</b>  | $\Delta recO$                                                                                                                                                                                                                                                  | MG1655        | Lambda RED recombination                                     |
| <b>EAW18</b>   | $\Delta dinB$                                                                                                                                                                                                                                                  | MG1655        | Lambda RED recombination                                     |
| <b>EAW573</b>  | $\Delta recO$ <i>raraAN447</i>                                                                                                                                                                                                                                 | EAW98         | Transduction of EAW98 with P1 grown on $\Delta recO$         |

|               |                        |        |                                                      |
|---------------|------------------------|--------|------------------------------------------------------|
| <b>THS130</b> | <i>ΔrecF rarAΔN447</i> | EAW98  | Transduction of EAW98 with P1 grown on <i>ΔrecF</i>  |
| <b>THS13</b>  | <i>ΔdinB rarAΔN447</i> | EAW98  | Transduction of EAW98 with P1 grown on <i>ΔdinB</i>  |
| <b>EAW984</b> | <i>ΔrecO rarAΔN406</i> | EAW974 | Transduction of EAW974 with P1 grown on <i>ΔrecO</i> |
| <b>EAW989</b> | <i>ΔrecF rarAΔN406</i> | EAW974 | Transduction of EAW974 with P1 grown on <i>ΔrecF</i> |
| <b>EAW979</b> | <i>ΔdinB rarAΔN406</i> | EAW974 | Transduction of EAW974 with P1 grown on <i>ΔdinB</i> |

97

98 **Table 1: List of strains used in this study**

99

## 100 **Plasmid construction**

101

102 All plasmids were sequenced to confirm the correct mutation(s)/insertion(s) following their  
103 construction. pBAD-*serS* is a pBAD/myc-His A Nde + wt *serS*. pEAW1176 was constructed by  
104 amplifying the wildtype *serS* gene containing NdeI and BamHI restriction cut sites from the *E.*  
105 *coli* MG1655 genome in a PCR. pBAD/myc-His A Nde was cut with NdeI and BglII enzymes  
106 (BglII creates compatible sticky ends with BamHI), while the PCR product was cut with NdeI and  
107 BamHI enzymes. The PCR product was ligated into the pBAD/myc-His A. pEAW1012 is a  
108 derivative of pRC7 plasmid (a lac<sup>+</sup> mini-F low copy derivative of pFZY1) that expresses a WT  
109 copy of the *rara* gene.

110

## 111 **Growth curve**

112 Overnight cultures of indicated strains were diluted 1:100 in LB medium. 100 μl of each culture  
113 was poured in a clear bottom 96 well plate (Corning). Cultures were grown at 37° C with orbital

114 shaking in a BioTek Synergy 2 plate reader. OD<sub>600</sub> values were taken every 10 minutes for over  
115 the course of 800 minutes. OD<sub>600</sub> values were normalized by subtracting out the OD<sub>600</sub> value of  
116 only LB media. All growth curves represent averaged values from the three biological replicate  
117 experiments.

118

## 119 **Growth competition assays**

120 Growth competition assays were conducted as previously described (63) using a method originally  
121 described by Lenski (60). The  $\Delta araBAD \Delta ParaB$  marker was included on either wild type  
122 (MG1655) or mutant ( $\Delta rarA$ ) in separate experiments to control for any effect the marker may  
123 have had on cell fitness.

124

## 125 **Drug sensitivity assay**

126 Overnight cultures of indicated strains were diluted 1:100 in fresh LB medium. Cultures were  
127 grown at 37°C with aeration and shaking until the OD<sub>600</sub> measured 0.2. 1 mL aliquots were taken  
128 from each culture and were serially diluted in 1X PBS buffer (137 mM NaCl, 2.7 mM KCl, 10  
129 mM Na<sub>2</sub>HPO<sub>4</sub>, 1.8 mM KH<sub>2</sub>PO<sub>4</sub>, 1 mM CaCl<sub>2</sub> and 0.5 mM MgCl<sub>2</sub>) to 10<sup>-6</sup>. 10 μL of each dilution  
130 were spot plated on LB agar plates containing the indicated media. Plates were incubated overnight  
131 at 37°C and imaged the following day using a FOTO/Analyst Apprentice Digital Camera System  
132 (Fotodyne, Inc.). All experiments were conducted at least three times.

133

## 134 **SOS induction assay**

135 Plasmid expressing the Green Fluorescent Protein (GFP) under the regulation of *recN* promoter  
136 (pEAW903) was used in this assay. First, either empty vector (pQBi63) or pEAW903 was  
137 transformed into the appropriate strains (WT, *rarA*ΔN447, or *rarA*ΔN406) and the transformants  
138 were selected on Amp100 (100 μg/ml) plates. The transformants were then grown in 3ml of LB +  
139 Amp100 medium overnight at 37°C. The next day, the cultures were diluted in 1:1000 ratio in LB  
140 + Amp100 broth and 150μl of sample were poured into each well of a 96-well plate (Corning  
141 Incorporated/Costar) and put into the plate reader (Synergy H1 Hybrid Reader by BioTek). The  
142 samples were allowed to grow for 1000 mins at 37°C, with OD<sub>600</sub> and GFP fluorescence  
143 (488/515nm) recorded at every 10 minutes. Relative fluorescence was calculated by normalizing  
144 the fluorescence reading to the OD<sub>600</sub> of the culture.

## 145 **Analysis of cell shape: Bright field microscopy**

146 All cells were grown overnight at 37°C and the saturated culture diluted in 1:100 ratio and grown  
147 in LB media till O.D. reaches 1.0. 200 μL of culture were then pelleted down, resuspended in  
148 1XPBS buffer and incubated with 2 μl of FM-64 dye (0.33M) on ice for at least 30 mins. For  
149 imaging, 2μl of this mixture were loaded onto 0.16mm thick borosilicate glass made coverslips  
150 (Azer scientific) and sandwiched with 1% agarose gel pad. For all measurements of cell size and  
151 filamentation, wide-field microscopy was conducted on a STORM/TIRF inverted microscope  
152 ECLIPSE Ti-E (Nikon) (100× objective). Images using DIA and dsRed filters were collected on  
153 an ORCA Flash 4.0 Hamamatsu camera. A bright-field and dsRed image (at 100 ms and 50ms  
154 exposure respectively) were taken at multiple fields of view to determine the cell shape and length.  
155 For analysis, all images were imported into MicrobeJ, an ImageJ plugin, to outline cells. Selected



156 cells were manually filtered for any outliers. All strains were imaged in triplicates and the cell size  
157 of each strain is averaged compiling each repeat.

## 158 **Results**

159 It is well documented that RarA is involved in the maintenance of genome stability in cells, but its  
160 precise function and mechanism of action remains an enigma. To identify the phenotypic  
161 contribution of RarA in cells, we created a MG1655 derivative carrying a full deletion of the *rarA*  
162 allele. No growth or viability phenotype has previously been ascribed to strains with a *rarA* gene  
163 deletion (42, 43, 56-58). Previous work has focused on a modified *rarA* gene in which a  
164 chloramphenicol cassette has replaced either the first 600 nucleotides of the *rarA* gene (42, 43, 56,  
165 57) or codons 113-349 (58), both in an *E. coli* AB1157 background. As most of our constructs are  
166 based on *E. coli* strain MG1655, we constructed a complete *rarA* gene deletion in the MG1655  
167 background using Datsenko and Wanner method (59) (**Figure 2A**), and then studied the effect of  
168 this deletion on cell fitness.

### 169 **Complete deletion of *rarA* causes a growth defect and reduced cell** 170 **size of MG1655 *E. coli* cells**

171 Using a plate reader, we noted and compared the growth of the *rarA* $\Delta$ *N447* strain to wild type cells  
172 at 37°C every 10 mins for 18hrs. The *rarA* $\Delta$ *N447* cells grew more slowly than wild type cells.  
173 (**Figure 2B**). To document the growth defect of the *rarA* $\Delta$ *N447* mutant with a different and more  
174 sensitive method, we carried out a direct competition assay between the wild type strain and the  
175 *rarA* $\Delta$ *N447* strain, using an approach developed by Lenski and colleagues (60). (**Figure 2C**). Wild

176 type or mutant cells were modified to carry a neutral Ara<sup>-</sup> mutation (which confers a red color on  
177 colonies when grown on tetrazolium arabinose (TA) indicator plates) to permit color-based scoring  
178 of mixed populations. Overnight cultures of the *raraΔN447* strain were mixed in a 50/50 ratio with  
179 isogenic wild type cells carrying the Ara<sup>-</sup> mutation, or vice versa. The mixed culture was then  
180 diluted and grown up again on successive days, with plating to count red and white colonies  
181 occurring once each day. Earlier work (60, 61) demonstrated that the Ara<sup>-</sup> mutation does not affect  
182 growth rates by itself. We found that the wild type cells outgrew the *raraΔN447* cells and  
183 dominated the mixed cultures almost completely within 24 hours (**Figure 2C**). We further  
184 investigated the phenotypic dissimilarities between *raraΔN447* and WT cells using bright field  
185 microscopy. We observed that *raraΔN447* cells were substantially smaller than *rara<sup>+</sup>* cells  
186 (1.58μm [SEM = 0.01] versus 2μm [SEM = 0.01] in length) (**Figure 2D**). RarA is well documented  
187 as a vital player in the DNA recombination and repair process. Suppressing the DNA repair system  
188 exerts stress response in the cell. With the data collected above, we presumed that the complete  
189 deletion of *rara* impedes the damage tolerance capability of the cells that results in a significant  
190 growth impact.

## 191 **Phenotypic defects of $\Delta$ *rara* cells are attributed to the lower** 192 **expression of *serS* gene**

193 For further affirmation of the results obtained above, we performed a complementation test. The  
194 pRC7 plasmid carrying a wild type copy of *rara* along with ampicillin marker is employed in this  
195 study. We incorporated this plasmid into *raraΔN447* cell and test its growth rate. Surprisingly, we  
196 observed no rescue of the growth defect even in the presence of wild-type copy of *rara* on the  
197 plasmid (**Figure 2E**). This observation signals that the growth defect observed earlier is not

198 directly associated with the absence of *raraA* but might be an outcome of that deletion on other  
199 growth-related genes.

200 Based on the genomic location position of *raraA*, we hypothesized that the growth defect might be  
201 ascribed to the defect in the closest downstream essential gene - *serS*. It is well documented that  
202 the addition of SHX (serine hydroxamate), an inhibitor of the *serRS* gene, causes growth defects  
203 in *E. coli* cells even under the nutrient rich conditions (55). Changes in the levels of *serS* are  
204 expected to fluctuate the levels of charged to uncharged tRNA ratios and thereby the cell growth.  
205 Decreased cell viability of *raraA* $\Delta$ *N447* could be a result of the decreased *serS* levels in the cell. To  
206 test this hypothesis, we incorporated a plasmid overexpressing *serS* in *raraA* $\Delta$ *N447* cells.  
207 Overproduction of *serS* rescued the growth defect of *raraA* $\Delta$ *N447* cells (**Figure 2F**). This result  
208 signals the presence of promoter element/regulatory sequence for *serS* gene within the coding  
209 region of a *raraA* gene. Removal of that segment impacts the level of *serS* in the cell.

210 **Figure 2: Complete deletion of *raraA* (*raraA* $\Delta$ *N447*) causes a growth defect in *E. coli* cell.**

211 (A) Schematic of a complete deletion of *raraA* via a FLP recombinase method in *E. coli*  
212 chromosome. The *raraA* gene segment is replaced by a Kan cassette. (B) Growth curve: Deletion  
213 of complete *raraA* gene exhibit growth defect. (C) Growth competition: *raraA* $\Delta$ *N447* is outcompeted  
214 by WT cells (D) Average cell size of  $\Delta$ *raraA* cells decreases compared to WT cells. (E) Addition  
215 of pRC7-*raraA*, carrying WT *raraA* copy, in  $\Delta$ *raraA* cell does not rescue its growth defect. (F)  
216 Overexpression of *serS* using pBAD vector rescues the growth defect of  $\Delta$ *raraA* cells (blue line).

217

218 Using the multi-genome browser of Ecocyc, we next searched for the orthologs of *rarA* in a broad  
219 range of organisms and then mapped the extent to which those orthologs have maintained their  
220 genetic context relative to *E. coli*. It revealed that the positioning of the *serS* gene - right  
221 downstream of the *rarA* gene locus - exists only in  $\gamma$ -proteobacteria class of the Proteobacteria  
222 phylum (**Figure 3**). Conservation of this proximity between *rarA* and *serS* genes across this class  
223 indicates their possible interconnection in other organisms of this class as well.

224 **Figure 3: Multiple genome sequence alignment to identify orthologs of *rarA*, and the**  
225 **conservation of its genetic context in other organisms.**

226

## 227 **Identification of promoter/regulatory sequence for *serS* gene in *rarA*** 228 **sequence**

229 We next aimed to identify the segment within a *rarA* gene that is controlling the *serS* expression  
230 under normal conditions. We constructed various *rarA* mutations differing in the number of  
231 nucleotides deleted from the N- terminus of the *rarA* to figure out the minimum region of *rarA*  
232 required to remain intact to mitigate the growth defect of *rarA* $\Delta$ N447 cells. GalK<sup>+</sup> recombineering  
233 method instead of Datensko Warner method was used to avoid any effect of kanamycin cassette  
234 sequence on the *serS* expression. We created four variants - *rarA* $\Delta$ N406, *rarA* $\Delta$ N430, *rarA* $\Delta$ N437,  
235 and *rarA* $\Delta$ N442, and studied their growth and cell morphology profiles (**Figure 4A**). Interestingly,  
236 none of these mutants showed any growth adversity like *rarA* $\Delta$ N447 (**Figure 4B and 4C**).  
237 However, the creation of complete deletion of *rarA* via galK recombineering method failed. This  
238 indicates that there exists a possible promoter or regulatory sequence for *serS* within the last 5

239 codons of *raraA* – deletion of which hampers the *serS* expression and thereby the growth of the cell.  
240 *serS* is mainly regulated by its promoter (*serSp1*) with a transcription start located at 28 nucleotides  
241 downstream from the end of *raraA* gene (46). Tracing back its possible promoter region, we  
242 suspected that the –10 region for this *serSp1* is located at ~14 nucleotide from the *raraA* end and its  
243 –35 is located (although there is no good consensus –35 there) within the last ~15 nucleotides of  
244 *raraA* gene. A –35 segment of the *serS* promoter or some equivalent regulatory sequence within  
245 this last segment of *raraA* gene makes the complete deletion of *raraA* an infeasible option in the *E.*  
246 *coli* cell.

247

248 **Figure 4: Analysis of the effect of various *raraA* deletion (*raraA* $\Delta$ N406, *raraA* $\Delta$ N430, *raraA* $\Delta$ N437,  
249 *raraA* $\Delta$ N442, and *raraA* $\Delta$ N447) on the growth and cell size.**

250 (A) Schematic of *raraA* gene, highlighting the possible promoter regions and positions of different  
251 deletions made. (B) Growth curve:  $\Delta$ *raraA*N406,  $\Delta$ *raraA*N430,  $\Delta$ *raraA*N437,  $\Delta$ *raraA*N442 does not  
252 exhibit a growth defect (C) Cell size: *raraA* $\Delta$ N406, *raraA* $\Delta$ N430, *raraA* $\Delta$ N437, *raraA* $\Delta$ N442 has cell  
253 morphology comparable to WT.

254

255 **Consequences of  $\Delta$ *raraA* on damage sensitivity of cells compromised  
256 with other DNA repair system**

257 We tested the drug sensitivity of  $\Delta$ *raraA*447 cell alone and it in combination with other repair  
258 systems. The absence of a complete *raraA* sequence itself does not increase the cell sensitivity to  
259 DNA damaging agents like UV or NFZ. Removal of a RecA-loading system like RecF or RecO,  
260 however, increases the sensitivity to almost all kinds of damages. Interestingly, deletion of *raraA*  
261 in *recF* or *recO* background rescues their damage sensitivity. Complete deletion of *raraA* in  $\Delta$ *pol*

262 *IV* background also decreases the sensitivity of *pol IV*- cells to both UV and NFZ induced damages  
263 (**Supplementary fig. 1**). Moreover, we observed that SOS response is also induced in *rara* $\Delta$ N447,  
264 at both with and without external damaging conditions (UV treatment). The induction was much  
265 higher than a WT cell (**Supplementary fig. 2**). Interestingly, none of these results were replicated  
266 when  $\Delta$ *rara*N406 background was used instead of *rara* $\Delta$ N447.

267  
268 With all these observations, we confirmed that the phenotype due to the complete deletion of *rara*  
269 is attributed to the decreased levels of *serS* in the cell. Decreased level of *serS* could cause a  
270 stringent response which activates the level of ppGpp. High levels of ppGpp act by rescuing the  
271 stalled RNA polymerases. The rescue of  $\Delta$ *pol IV*/ $\Delta$ *recF*/ $\Delta$ *recO* cells' drug sensitivity on deletion  
272 of *rara* $\Delta$ N447 may be due to the rescue of stalled RNA polymerases, an outcome of the action of  
273 high levels of ppGpp in *rara* $\Delta$ N447 cells. High SOS levels could also be a repercussion of this  
274 same phenomenon. Deletion of all but the last 41 codons of *rara* eliminates all these phenotypes.

275

## 276 **Discussion**

277 The major conclusion of this work is straightforward. Genetic elements affecting the expression  
278 of the *serS* gene are embedded in the final five codons of the upstream *rara* gene. Upon complete  
279 deletion of *rara*, we had documented a variety of phenotypic effects (supplementary data) that we  
280 initially attributed to a loss of *rara* function. These disappeared when we made use of *rara*  
281 deletions that encompasses most but not all of the gene. We now attribute the effects to changes  
282 in *serS* expression, possibly reflecting some aspect of a stringent response.

283 The *serS* promoter element that is within the *rarA* gene has not been identified. The region  
284 in question is positioned so as to potentially include a –35 region for the promoter. However, no –  
285 35 consensus is evident.

286

287

## 288 **References**

289

- 290 1. Cox MM, Goodman MF, Kreuzer KN, Sherratt DJ, Sandler SJ, Mariani KJ. The  
291 importance of repairing stalled replication forks. *Nature*. 2000;404(6773):37-41.
- 292 2. Cox MM. Recombinational DNA repair of damaged replication forks in *Escherichia coli*:  
293 questions. *Annual Review of Genetics*. 2001;35:53-82.
- 294 3. Kowalczykowski SC. Initiation of genetic recombination and recombination-dependent  
295 replication. *Trends in Biochemical Sciences*. 2000;25:156-65.
- 296 4. Kuzminov A. Recombinational repair of DNA damage in *Escherichia coli* and  
297 bacteriophage lambda. *Microbiology & Molecular Biology Reviews*. 1999;63(4):751-813.
- 298 5. Kuzminov A. Single-strand interruptions in replicating chromosomes cause double-strand  
299 breaks. *Proceedings of the National Academy of Sciences of the United States of America*.  
300 2001;98(15):8241-6.
- 301 6. Michel B. Replication fork arrest and DNA recombination. *Trends in Biochemical*  
302 *Sciences*. 2000;25:173-8.
- 303 7. Michel B, Boubakri H, Baharoglu Z, LeMasson M, Lestini R. Recombination proteins and  
304 rescue of arrested replication forks. *DNA Repair*. 2007;6(7):967-80.
- 305 8. Heller RC, Mariani KJ. Replisome assembly and the direct restart of stalled replication  
306 forks. *Nature Reviews Molecular Cell Biology*. 2006;7(12):932-43.
- 307 9. Klein HL, Kreuzer KN. Replication, recombination, and repair: going for the gold.  
308 *Molecular Cell*. 2002;9(3):471-80.
- 309 10. Lopes M, Cotta-Ramusino C, Pelliccioli A, Liberi G, Plevani P, Muzi-Falconi M, et al. The  
310 DNA replication checkpoint response stabilizes stalled replication forks. *Nature*.  
311 2001;412(6846):557-61.
- 312 11. Merrikh H, Zhang Y, Grossman AD, Wang JD. Replication-transcription conflicts in  
313 bacteria. *Nature Reviews Microbiology*. 2012;10(7):449-58.
- 314 12. Cox MM. Recombinational DNA repair in bacteria and the RecA protein. *Progress in*  
315 *Nucleic Acids Research and Molecular Biology*. 2000;63:311-66.
- 316 13. Cox MM. The nonmutagenic repair of broken replication forks via recombination.  
317 *Mutation Research-Fundamental and Molecular Mechanisms of Mutagenesis*. 2002;510(1-2  
318 Special Issue SI):107-20.
- 319 14. Kuzminov A. Collapse and repair of replication forks in *Escherichia coli*. *Molecular*  
320 *Microbiology*. 1995;16(3):373-84.
- 321 15. McCool JD, Long E, Petrosino JF, Sandler HA, Rosenberg SM, Sandler SJ. Measurement  
322 of SOS expression in individual *Escherichia coli* K-12 cells using fluorescence microscopy.  
323 *Molecular Microbiology*. 2004;53(5):1343-57.

- 324 16. Michel B, Flores MJ, Viguera E, Grompone G, Seigneur M, Bidnenko V. Rescue of  
325 arrested replication forks by homologous recombination. *Proceedings of the National Academy of*  
326 *Sciences of the United States of America*. 2001;98(15):8181-8.
- 327 17. Michel B, Grompone G, Flores MJ, Bidnenko V. Multiple pathways process stalled  
328 replication forks. *Proceedings of the National Academy of Sciences of the United States of*  
329 *America*. 2004;101(35):12783-8.
- 330 18. Syeda AH, Hawkins M, McGlynn P. Recombination and Replication. *Cold Spring Harbor*  
331 *Perspectives in Biology*. 2014;6(11).
- 332 19. Mangiameli SM, Veit BT, Merrikh H, Wiggins PA. The Replisomes Remain Spatially  
333 Proximal throughout the Cell Cycle in Bacteria. *PLoS Genetics*. 2017;13(1):e006582.
- 334 20. Courcelle J, Wendel BM, Livingstone DD, Courcelle CT. RecBCD is required to complete  
335 chromosomal replication: Implications for double-strand break frequencies and repair  
336 mechanisms. *DNA Repair*. 2015;32:86-95.
- 337 21. Kuzminov A. DNA replication meets genetic exchange: Chromosomal damage and its  
338 repair by homologous recombination. *Proceedings of the National Academy of Sciences of the*  
339 *United States of America*. 2001;98(15):8461-8.
- 340 22. Kuzminov A, Stahl FW. Double-strand end repair via the RecBC pathway in *Escherichia*  
341 *coli* primes DNA replication. *Genes & Development*. 1999;13(3):345-56.
- 342 23. Michel B, Recchia GD, Penel-Colin M, Ehrlich SD, Sherratt DJ. Resolution of Holliday  
343 junctions by RuvABC prevents dimer formation in rep mutants and UV-irradiated cells. *Molecular*  
344 *Microbiology*. 2000;37(1):180-91.
- 345 24. Heller RC, Marians KJ. Replication fork reactivation downstream of a blocked nascent  
346 leading strand. *Nature*. 2006;439(7076):557-62.
- 347 25. Mirkin EV, Mirkin SM. Replication fork stalling at natural impediments. *Microbiology*  
348 *and Molecular Biology Reviews*. 2007;71(1):13-35.
- 349 26. Aguilera A, Garcia-Muse T. Causes of genome instability. *Annual Review of Genetics*,  
350 *Vol 47*. 2013;47:1-32.
- 351 27. Branzei D, Szakal B. Building up and breaking down: mechanisms controlling  
352 recombination during replication. *Critical Reviews in Biochemistry and Molecular Biology*.  
353 2017;52(4):381-94.
- 354 28. Rothman RH, Clark AJ. Defective excision and postreplication repair of UV-damaged  
355 DNA in a recL mutant strain of *E. coli* K-12. *Molecular & General Genetics*. 1977;155(3):267-77.
- 356 29. Goodman MF. The discovery of error-prone DNA polymerase V and its unique regulation  
357 by RecA and ATP. *J Biol Chem*. 2014;289(39):26772-82.
- 358 30. Umezu K, Chi NW, Kolodner RD. Biochemical interaction of the *Escherichia coli* RecF,  
359 RecO, and RecR proteins with RecA protein and single-stranded DNA binding protein. *Proc Natl*  
360 *Acad Sci U S A*. 1993;90(9):3875-9.
- 361 31. Umezu K, Kolodner RD. Protein interactions in genetic recombination in *Escherichia coli*.  
362 Interactions involving RecO and RecR overcome the inhibition of RecA by single-stranded DNA-  
363 binding protein. *J Biol Chem*. 1994;269(47):30005-13.
- 364 32. Bork JM, Cox MM, Inman RB. The RecOR proteins modulate RecA protein function at 5  
365 ' ends of single-stranded DNA. *EMBO Journal*. 2001;20(24):7313-22.
- 366 33. Fuchs RP. Tolerance of lesions in *E. coli*: Chronological competition between translesion  
367 synthesis and damage avoidance. *DNA Repair*. 2016;44:51-8.
- 368 34. Grompone G, Sanchez N, Ehrlich SD, Michel B. Requirement for RecFOR-mediated  
369 recombination in priA mutant. *Molecular Microbiology*. 2004;52(2):551-62.



- 370 35. Kuzminov A. RuvA, RuvB and RuvC proteins: cleaning-up after recombinational repairs  
371 in *E. coli*. . Bioessays. 1993;15(5):355-8.
- 372 36. Henrikus SS, van Oijen AM, Robinson A. Specialised DNA polymerases in *Escherichia*  
373 *coli*: roles within multiple pathways. Current Genetics. 2018;64(6):1189-96.
- 374 37. Bichara M, Meier M, Wagner J, Cordonnier A, Lambert IB. Postreplication repair  
375 mechanisms in the presence of DNA adducts in *Escherichia coli*. Mutation Research-Reviews in  
376 Mutation Research. 2011;727(3):104-22.
- 377 38. Dutra BE, Sutera VA, Jr., Lovett ST. RecA-independent recombination is efficient but  
378 limited by exonucleases. Proc Natl Acad Sci U S A. 2007;104(1):216-21.
- 379 39. Lovett ST, Hurley RL, Sutera VA, Aubuchon RH, Lebedeva MA. Crossing over between  
380 regions of limited homology in *Escherichia coli*: RecA-dependent and RecA-independent  
381 pathways. Genetics. 2002;160(3):851-9.
- 382 40. Lovett ST. Template-switching during replication fork repair in bacteria. DNA Repair.  
383 2017;56:118-28.
- 384 41. Jain K, Wood EA, Romero ZJ, Cox MM. RecA-independent recombination: Dependence  
385 on the *Escherichia coli* RarA protein. Mol Microbiol. 2021;115(6):1122-37.
- 386 42. Sherratt DJ, Soballe B, Barre FX, Filipe S, Lau I, Massey T, et al. Recombination and  
387 chromosome segregation. Philosophical Transactions of the Royal Society of London Series B-  
388 Biological Sciences. 2004;359(1441):61-9.
- 389 43. Barre FX, Soballe B, Michel B, Aroyo M, Robertson M, Sherratt D. Circles: The  
390 replication-recombination-chromosome segregation connection. Proceedings of the National  
391 Academy of Sciences of the United States of America. 2001;98(15):8189-95.
- 392 44. Leinfelder W, Zehelein E, Mandrand-Berthelot MA, Böck A. Gene for a novel tRNA  
393 species that accepts L-serine and cotranslationally inserts selenocysteine. Nature.  
394 1988;331(6158):723-5.
- 395 45. Baron C, Böck A. The length of the aminoacyl-acceptor stem of the selenocysteine-specific  
396 tRNA(Sec) of *Escherichia coli* is the determinant for binding to elongation factors SELB or Tu. J  
397 Biol Chem. 1991;266(30):20375-9.
- 398 46. Keseler IM, Collado-Vides J, Santos-Zavaleta A, Peralta-Gil M, Gama-Castro S, Muñoz-  
399 Rascado L, et al. EcoCyc: a comprehensive database of *Escherichia coli* biology. Nucleic Acids  
400 Res. 2011;39(Database issue):D583-90.
- 401 47. Bremer H, Dennis PP. Modulation of Chemical Composition and Other Parameters of the  
402 Cell at Different Exponential Growth Rates. EcoSal Plus. 2008;3(1).
- 403 48. Dai X, Zhu M, Warren M, Balakrishnan R, Patsalo V, Okano H, et al. Reduction of  
404 translating ribosomes enables *Escherichia coli* to maintain elongation rates during slow growth.  
405 Nat Microbiol. 2016;2:16231.
- 406 49. Hinnebusch AG. TRANSLATIONAL REGULATION OF GCN4 AND THE GENERAL  
407 AMINO ACID CONTROL OF YEAST. Annual Review of Microbiology. 2005;59(1):407-50.
- 408 50. Potrykus K, Cashel M. (p)ppGpp: Still Magical? Annual Review of Microbiology.  
409 2008;62(1):35-51.
- 410 51. Srivatsan A, Wang JD. Control of bacterial transcription, translation and replication by (p)  
411 ppGpp. Current Opinion in Microbiology. 2008;11(2):100-5.
- 412 52. Gourse RL, Chen AY, Gopalkrishnan S, Sanchez-Vazquez P, Myers A, Ross W.  
413 Transcriptional Responses to ppGpp and DksA. Annual Review of Microbiology. 2018;72(1):163-  
414 84.

- 415 53. Hauryliuk V, Atkinson GC, Murakami KS, Tenson T, Gerdes K. Recent functional insights  
416 into the role of (p)ppGpp in bacterial physiology. *Nature Reviews Microbiology*. 2015;13(5):298-  
417 309.
- 418 54. Liu KQ, Bittner AN, Wang JD. Diversity in (p)ppGpp metabolism and effectors. *Current*  
419 *Opinion in Microbiology*. 2015;24:72-9.
- 420 55. Tosa T, Pizer Lewis I. Effect of Serine Hydroxamate on the Growth of *Escherichia coli*.  
421 *Journal of Bacteriology*. 1971;106(3):966-71.
- 422 56. Lestini R, Michel B. UvrD controls the access of recombination proteins to blocked  
423 replication forks. *EMBO J*. 2007;26(16):3804-14.
- 424 57. Michel B, Sinha AK. The inactivation of *rfaP*, *rarA* or *sspA* gene improves the viability of  
425 the *Escherichia coli* DNA polymerase III *hoD* mutant. *Molecular Microbiology*. 2017;in process.
- 426 58. Shibata T, Hishida T, Kubota Y, Han YW, Iwasaki H, Shinagawa H. Functional overlap  
427 between *RecA* and *MgsA* (*RarA*) in the rescue of stalled replication forks in *Escherichia coli*.  
428 *Genes to Cells*. 2005;10(3):181-91.
- 429 59. Datsenko KA, Wanner BL. One-step inactivation of chromosomal genes in *Escherichia*  
430 *coli* K-12 using PCR products. *Proceedings of the National Academy of Sciences of the United*  
431 *States of America*. 2000;97(12):6640-5.
- 432 60. Lenski RE. Quantifying fitness and gene stability in microorganisms. *Biotechnology*.  
433 1991;15:173-92.
- 434 61. Byrne RT, Chen SH, Wood EA, Cabot EL, Cox MM. Surviving extreme exposure to  
435 ionizing radiation: *Escherichia coli* genes and pathways  
436 . *Journal of Bacteriology*. 2014;196:3534-45.
- 437 62. Huang LC, Wood EA, Cox MM. Convenient and reversible site-specific targeting of  
438 exogenous DNA into a bacterial chromosome by use of the FLP recombinase: the FLIRT system.  
439 *Journal of Bacteriology*. 1997;179(19):6076-83.
- 440 63. Kim T, Chitteni-Pattu S, Cox BL, Wood EA, Sandler SJ, Cox MM. Directed evolution of  
441 *RecA* variants with enhanced capacity for conjugational recombination. *PLoS Genet*.  
442 2015;11(6):e1005278.

443

444

## 445 **Supporting information**

### 446 **Supplementary Fig 1: Consequence of complete deletion of *rarA* on DNA damage sensitivity**

447 **of the cell.** (A) Complete deletion of *rarA* is able to rescue the sensitivity of  $\Delta recF$  and  $\Delta recO$  to

448 UV and  $\Delta dinB$  to NFZ. (B) Incorporation of  $\Delta rarAN406$  does not rescue the sensitivity of  $\Delta recF$

449 and  $\Delta recO$  to UV and  $\Delta dinB$  to NFZ.

450

451 **Supplementary Fig 2: SOS induction is highly induced on UV exposure in cells carrying**  
452 **complete deletion of *rarA* (*rarA* $\Delta$ *N447*) from the cell.** Complete deletion of *rarA* induces SOS  
453 response more than WT cell, in presence and absence of UV exposure.  
454

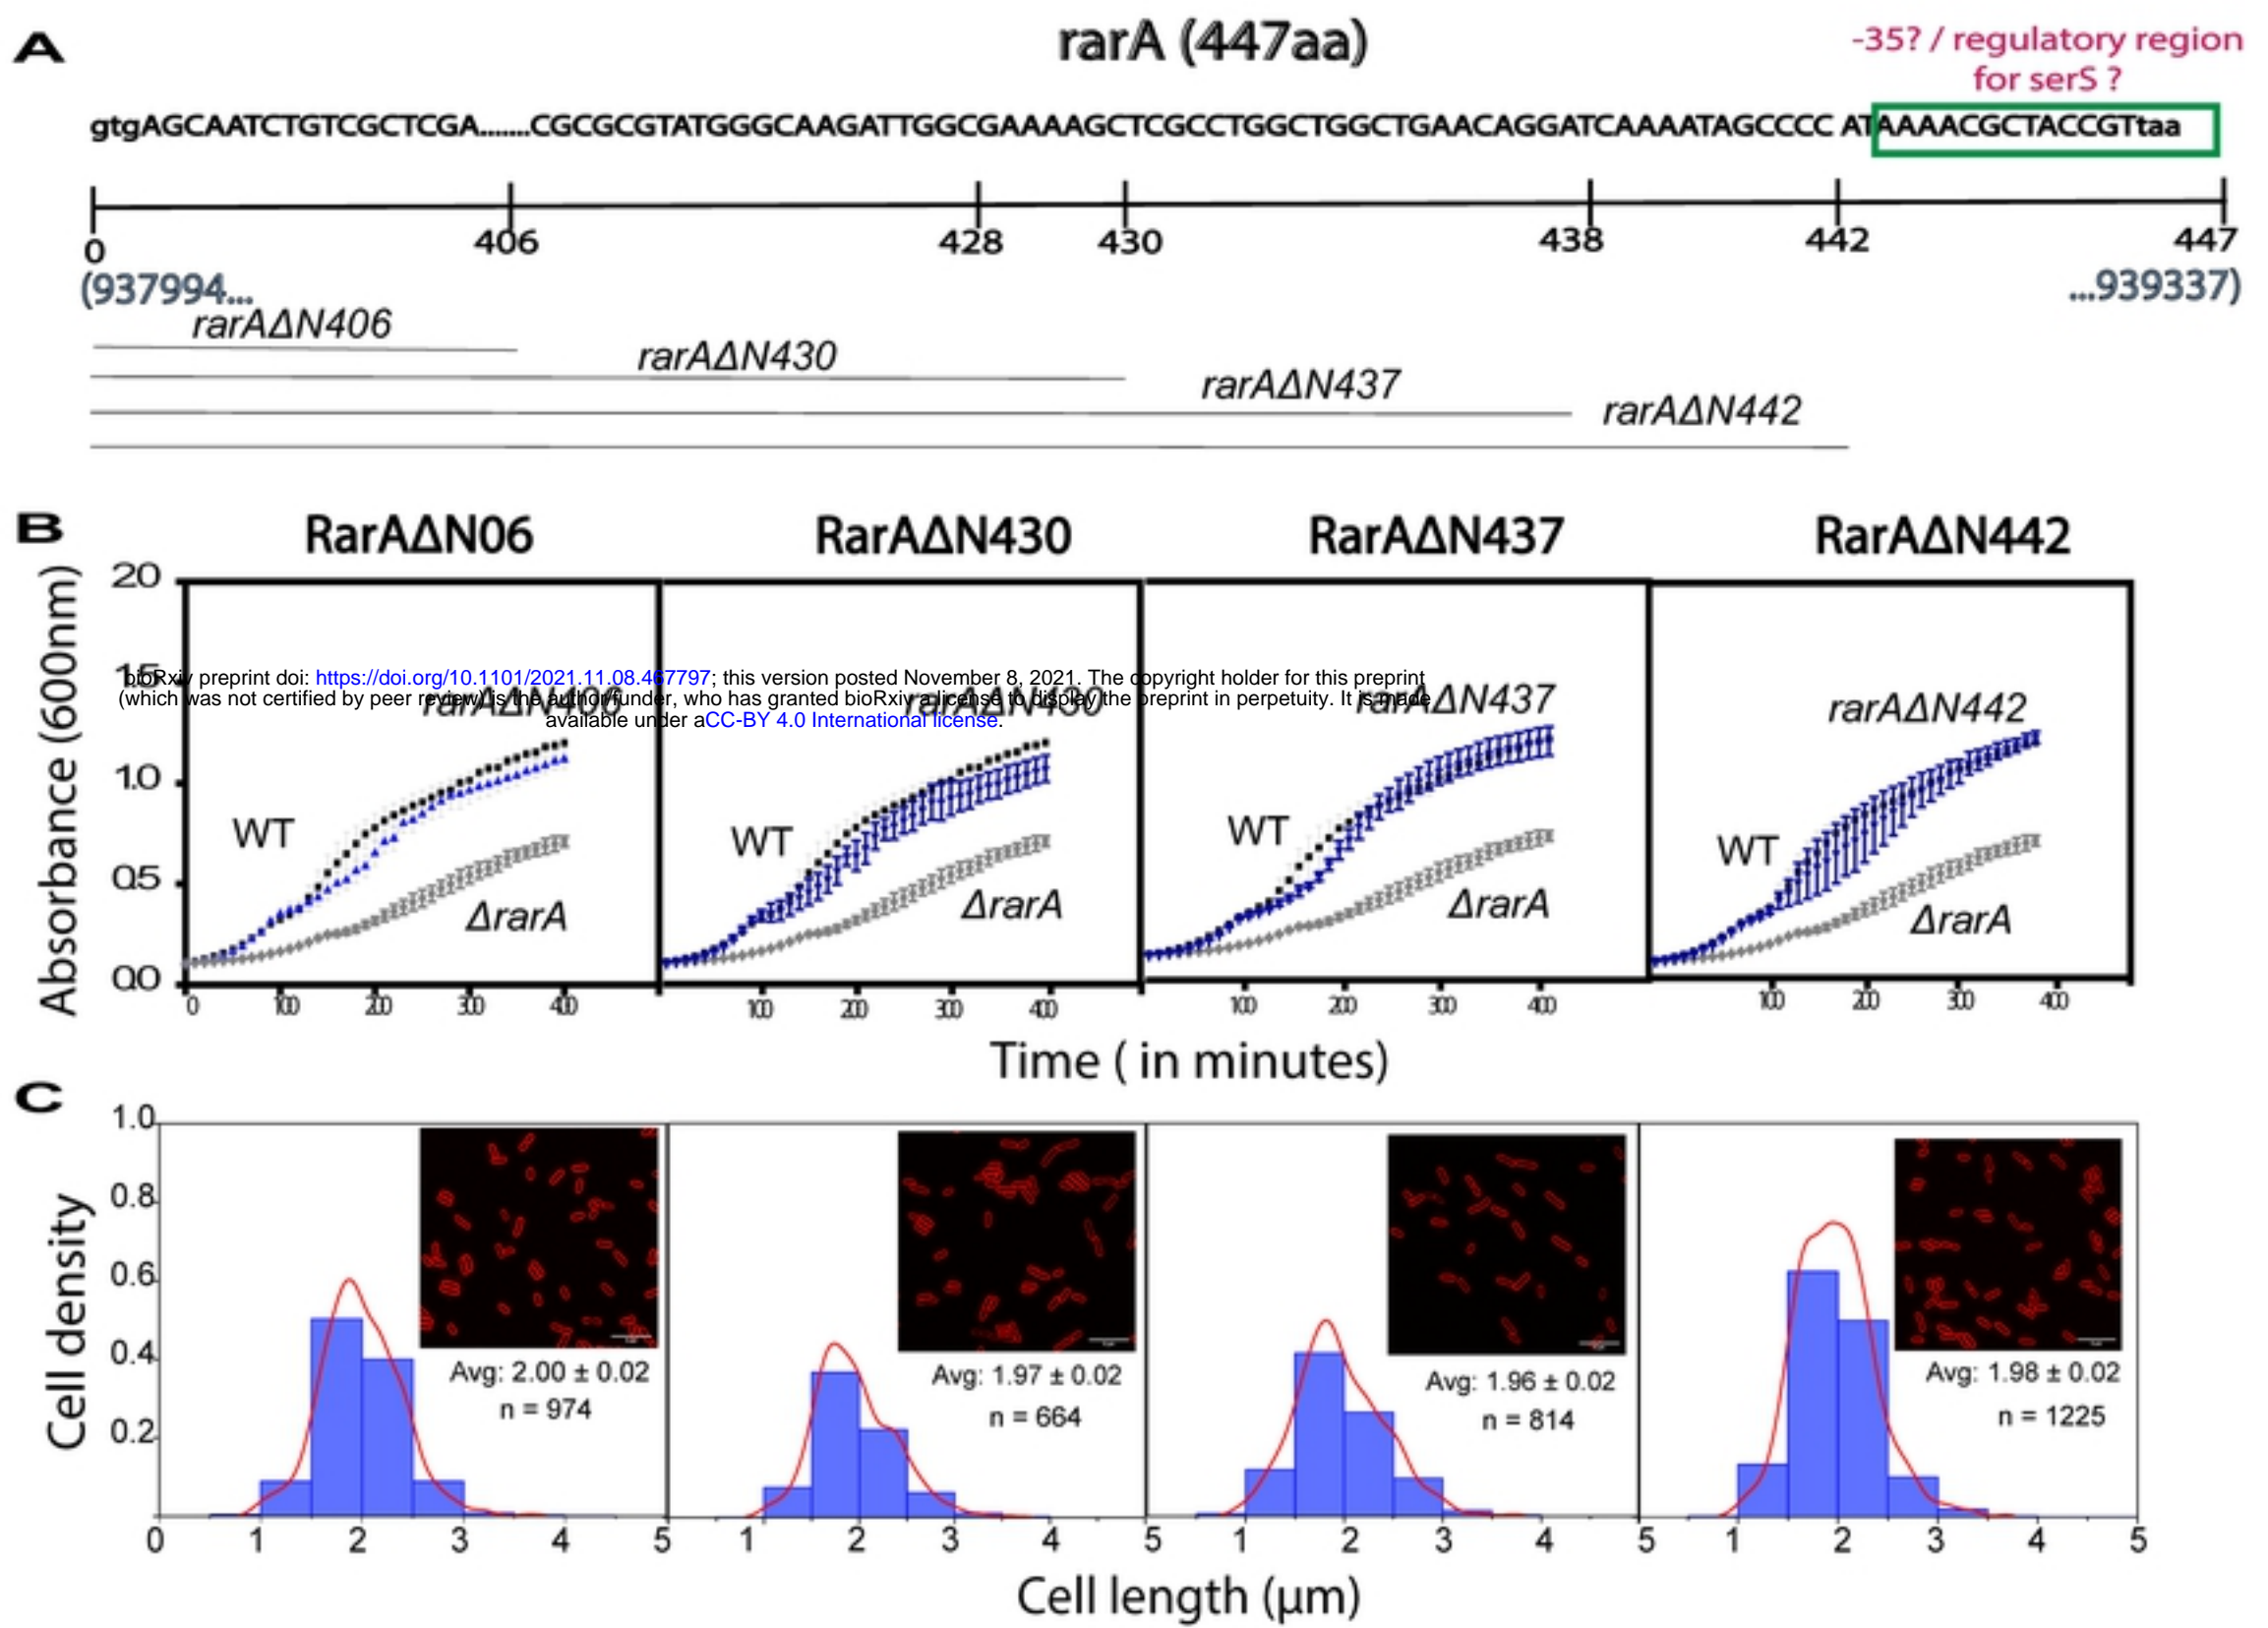

Figure 4

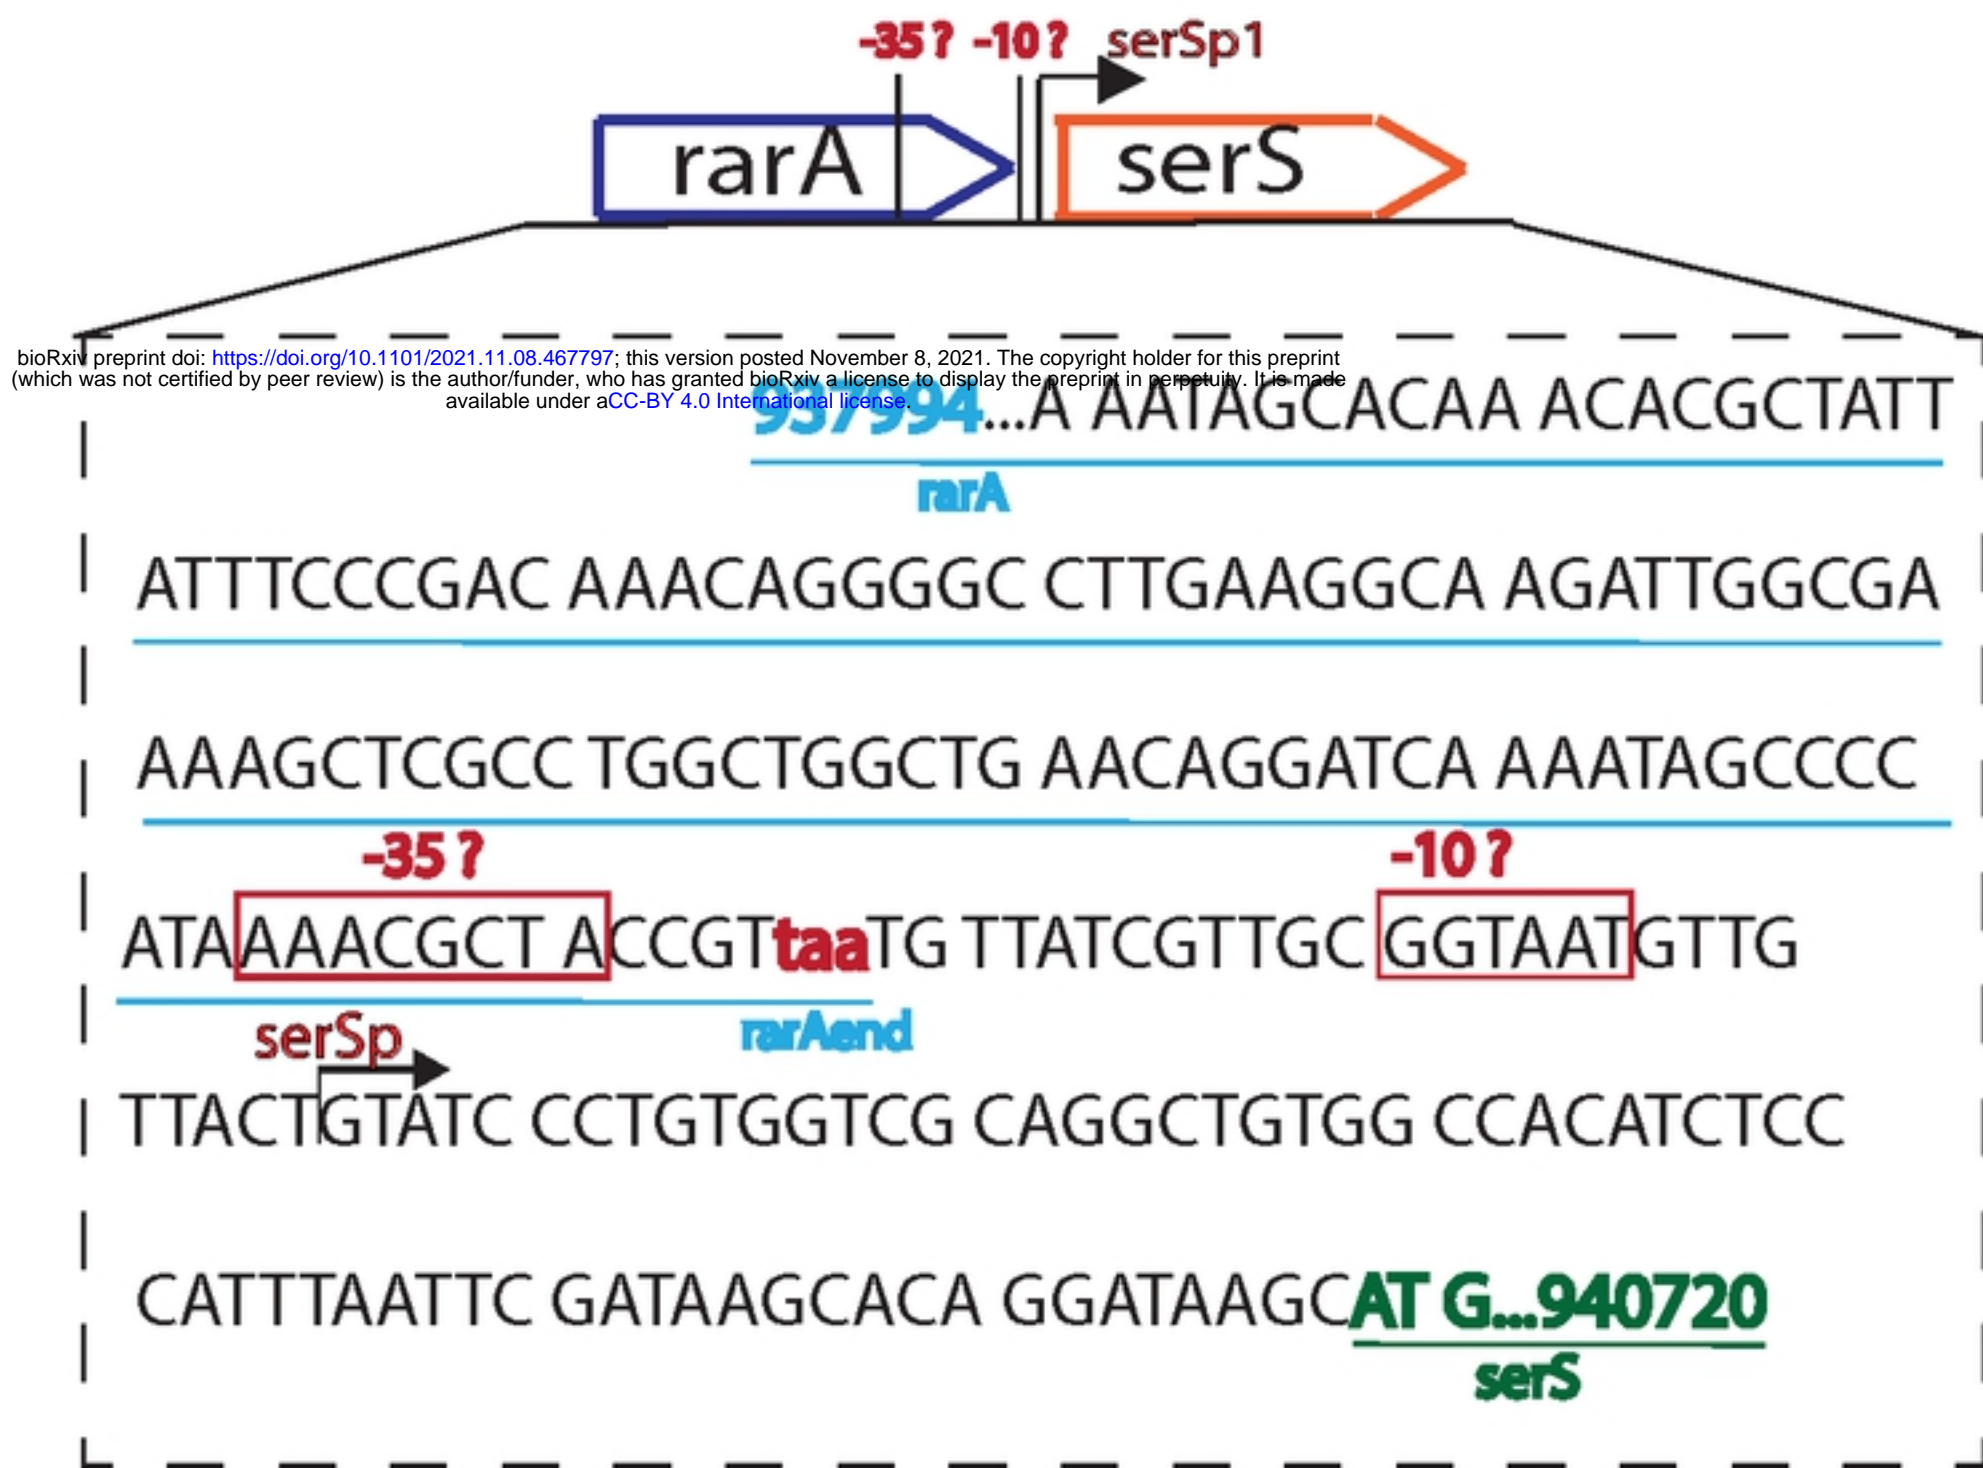

Figure 1

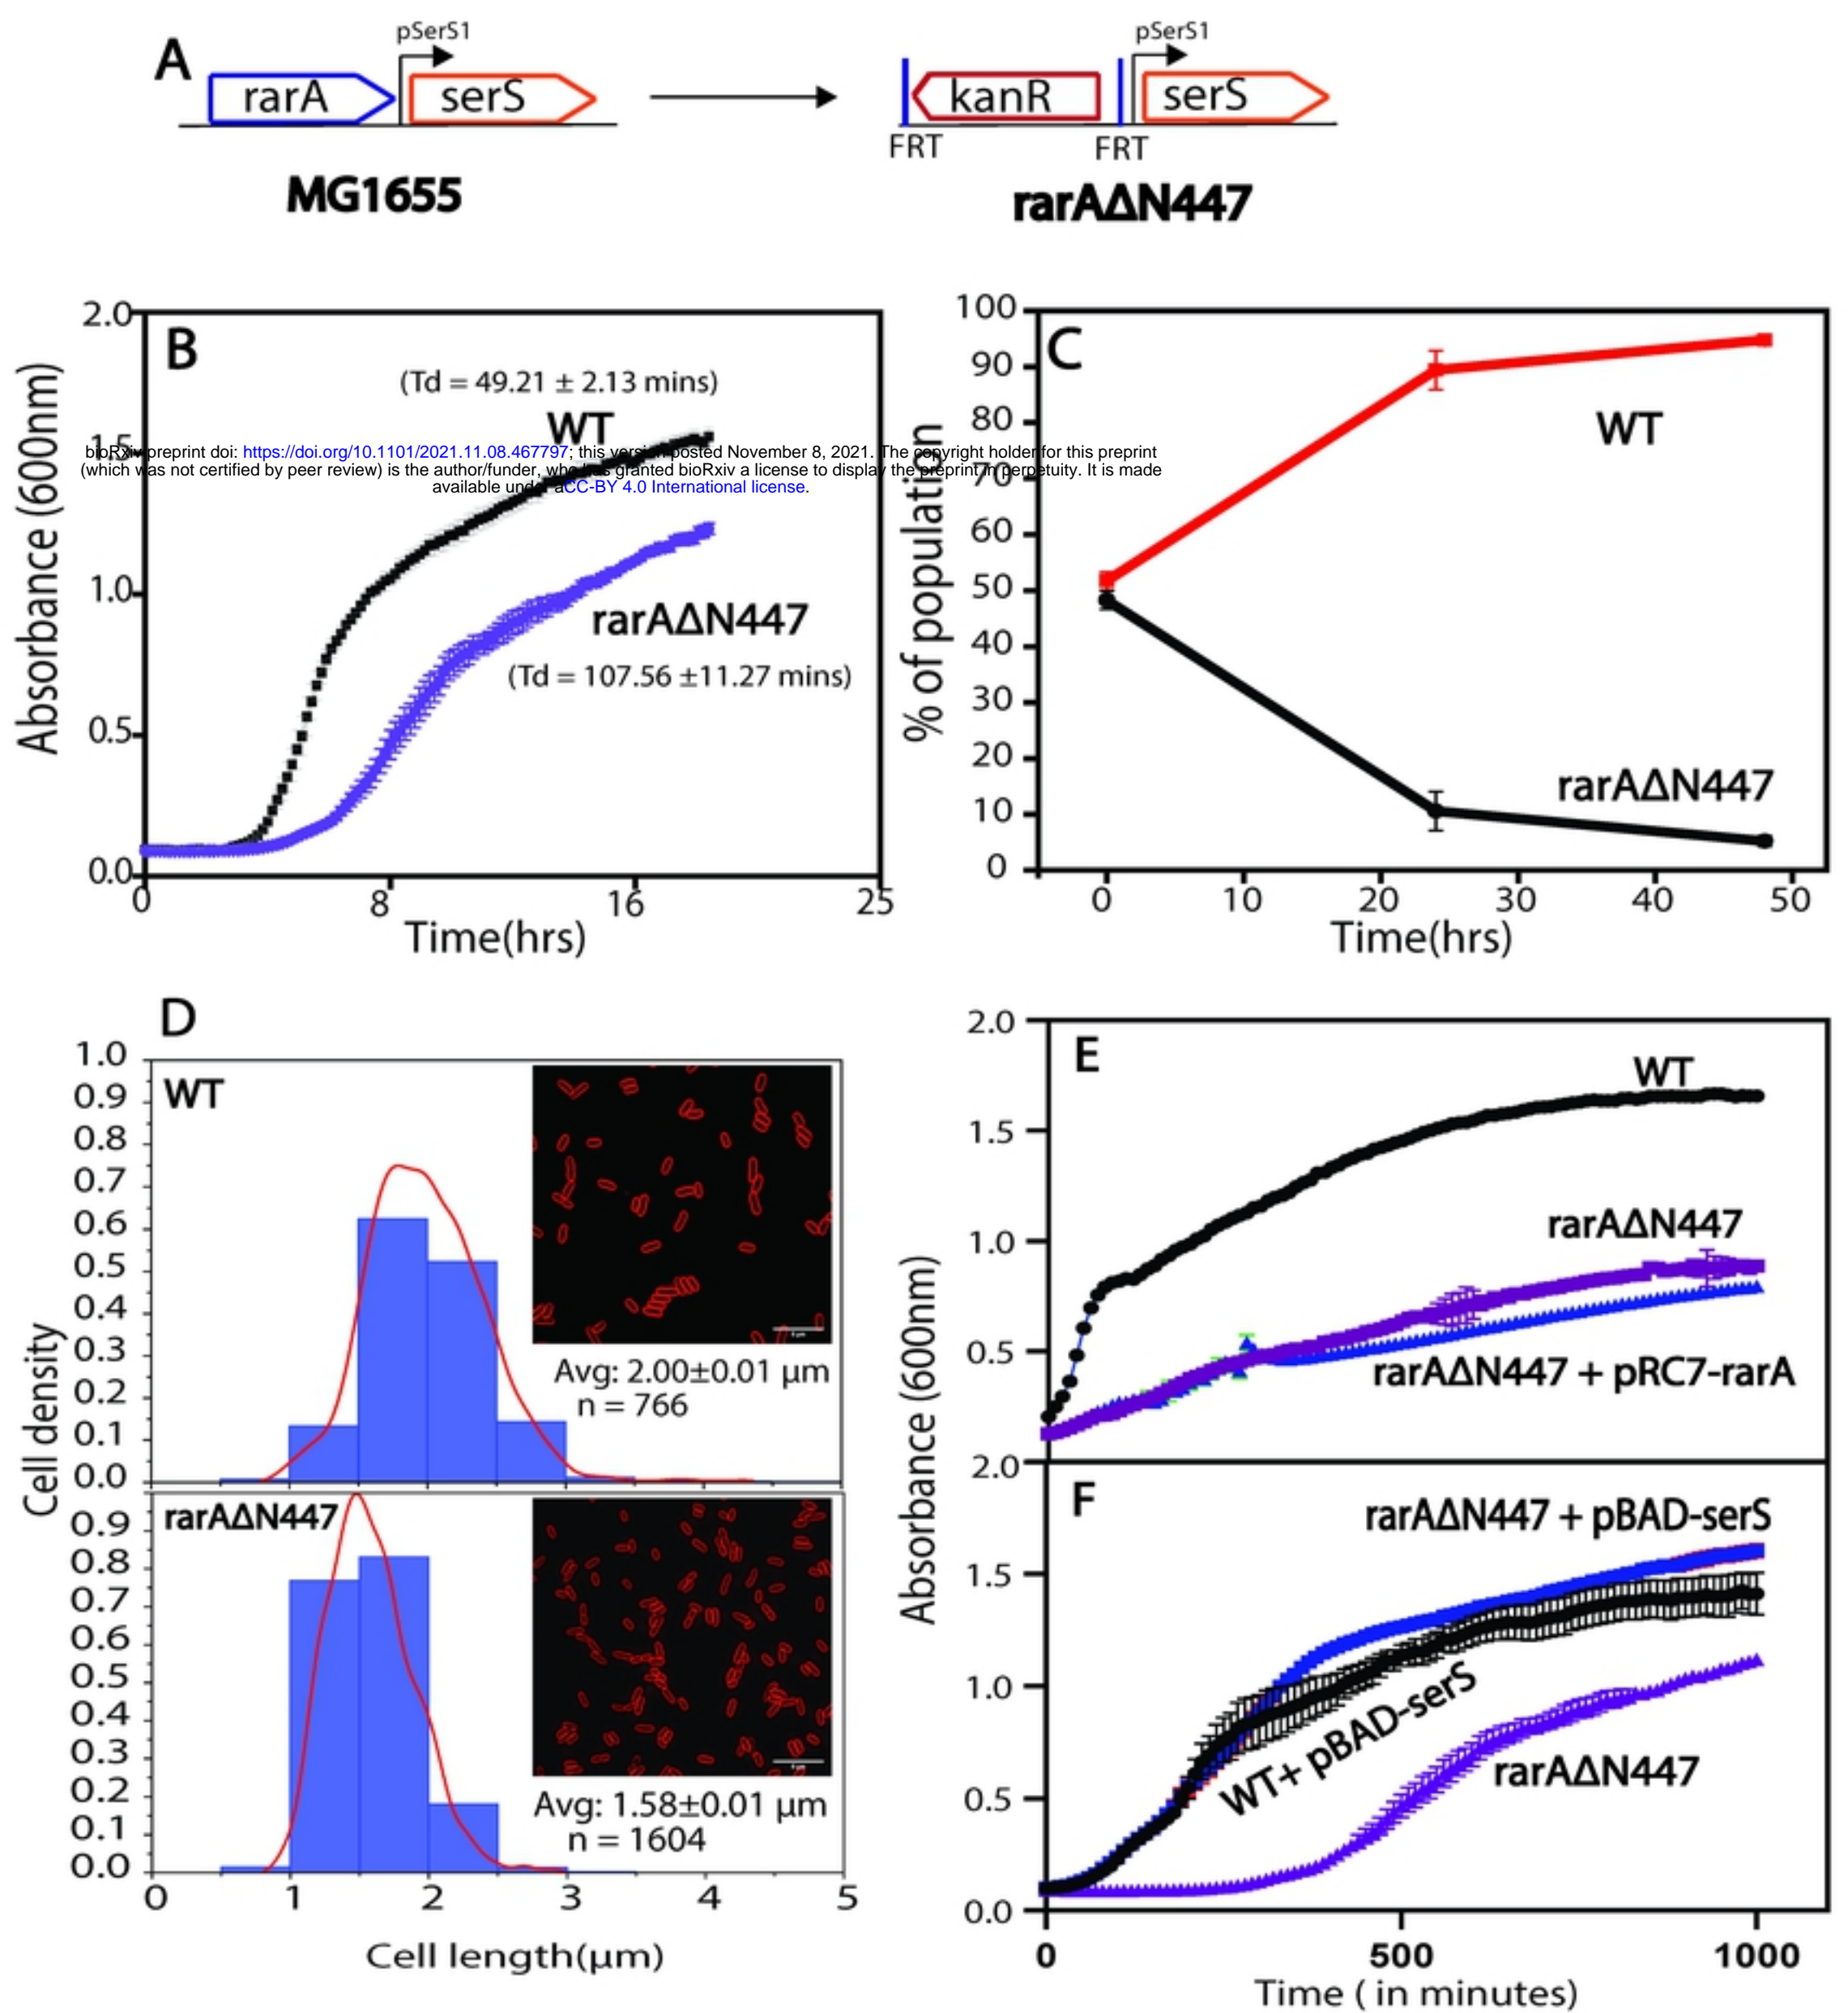

Figure 2

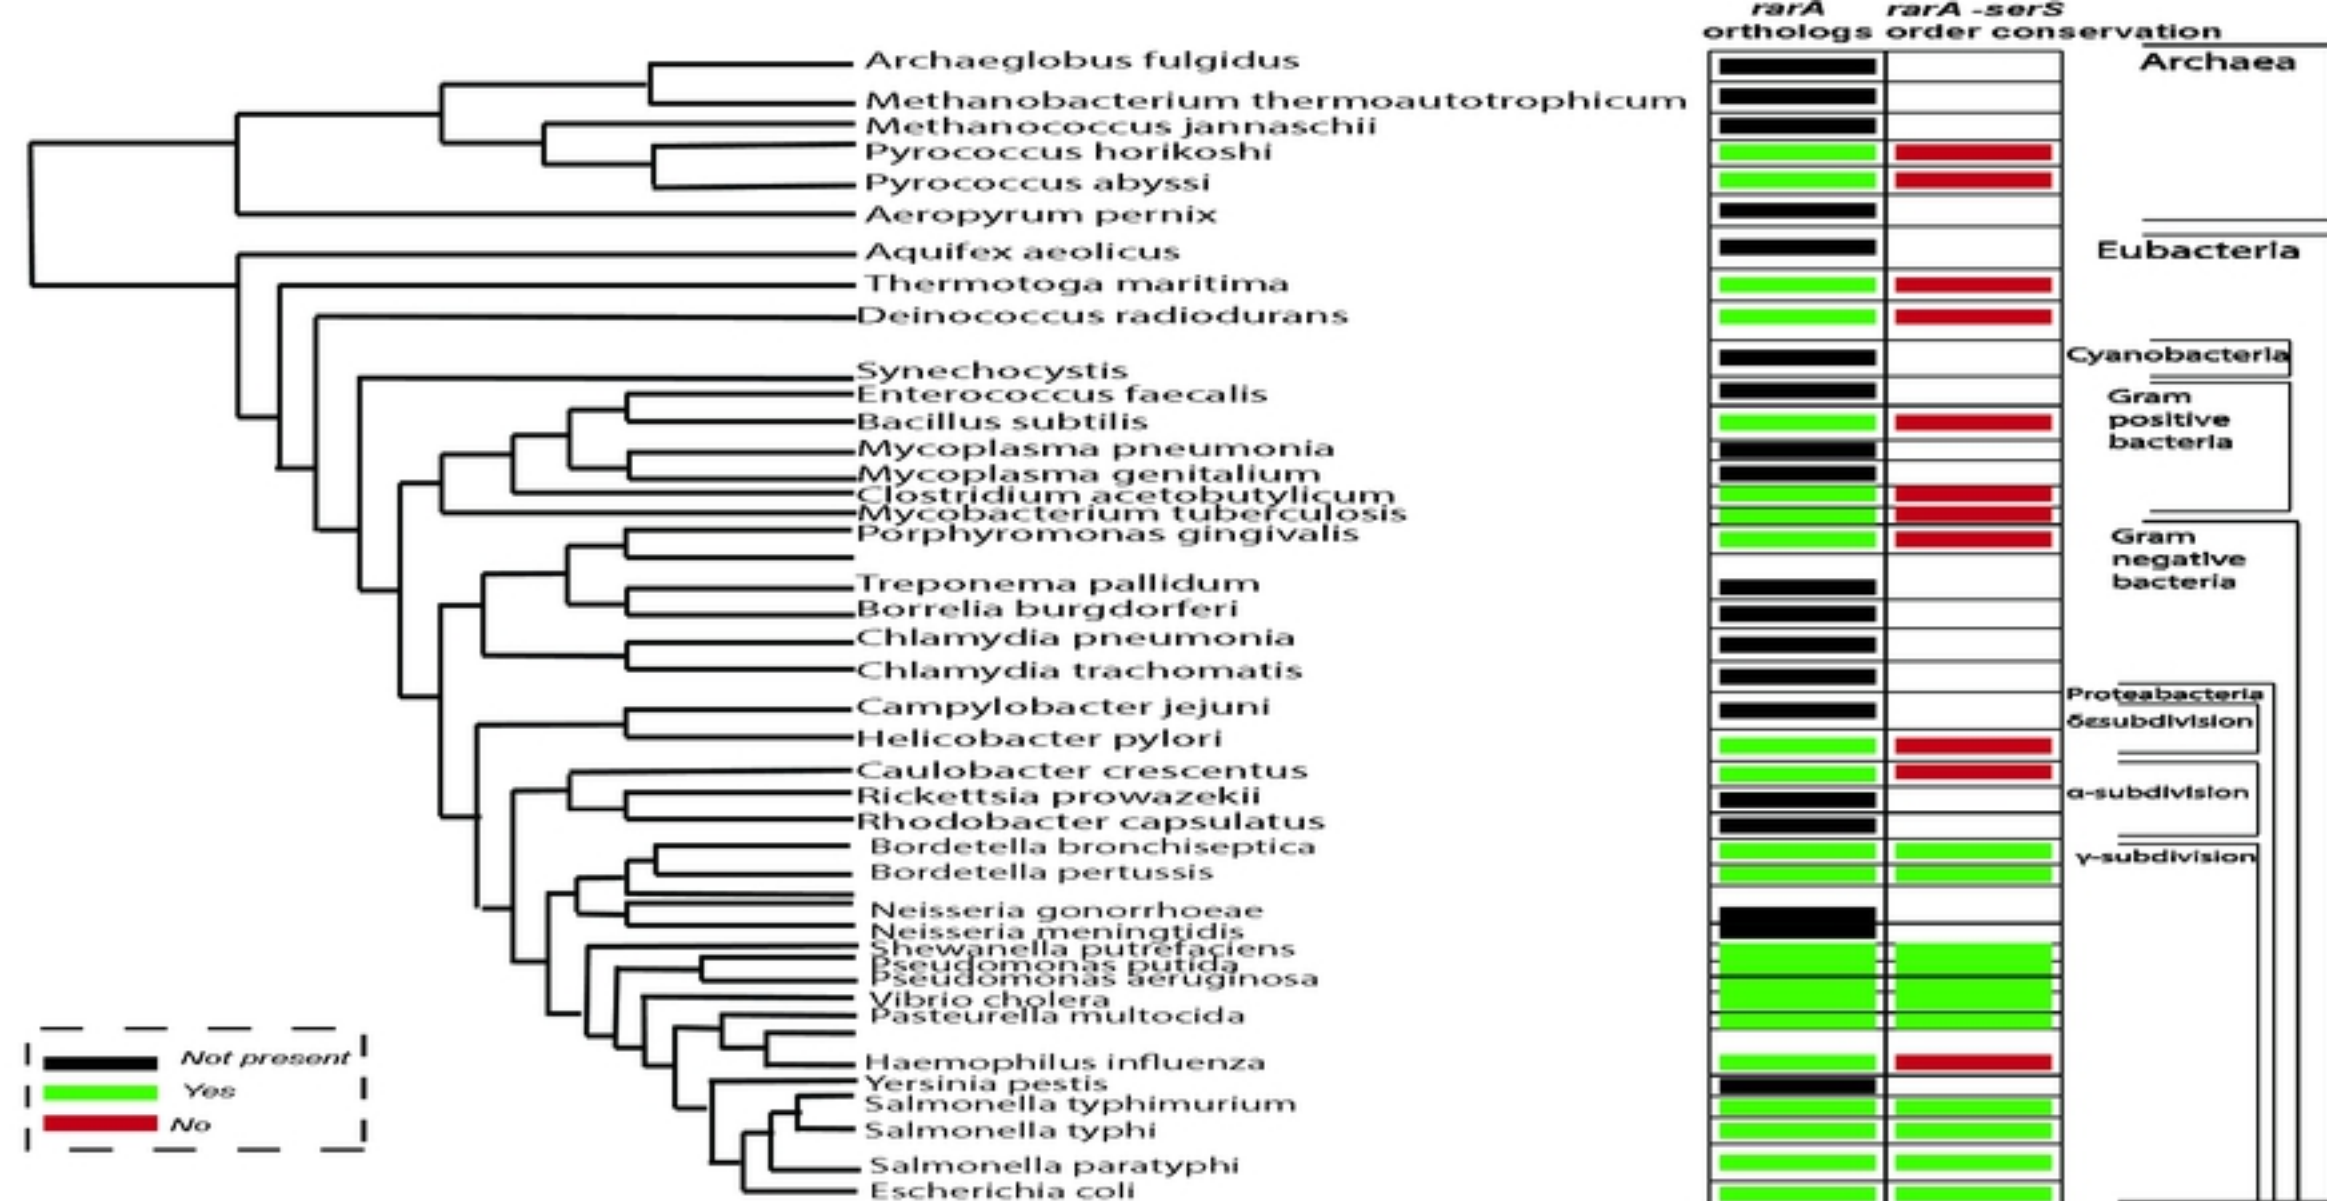

Figure 3
